# Supplementary material for: Electronic state dependence of the ion–molecule reaction CH3CN+ + CH3CN → CH4CN+ + CH2CN: threshold electron–secondary ion coincidence (TESICO) and direct ab initio molecular dynamics study
Source: Royal Society of Chemistry journal article supplement (doi:10.1039/c004202a), 2010-01-01
Supplement: c004202a.pdf [file c004202a.pdf]

SUPPORTING INFORMATION

*Electronic state dependence of the ion-molecule reaction  $\text{CH}_3\text{CN}^+ + \text{CH}_3\text{CN} \rightarrow$*

*$\text{CH}_4\text{CN}^+ + \text{CH}_2\text{CN}$ :*

*Threshold electron-secondary ion coincidence (TESICO) and direct ab-initio*

*molecular dynamics Study*

Takahiro FUKUZUMI<sup>a</sup>, Kazushige INAOKA<sup>a</sup>, Inosuke KOYANO<sup>a</sup>

and Hiroto TACHIKAWA<sup>\*b</sup>

<sup>a</sup>*Department of Material Science, Himeji Institute of Technology, Hyogo 678-1297,*

*Japan*

<sup>b</sup>*Graduate School of Engineering, Hokkaido University, Sapporo 060-8628, Japan*

1. Graphical Abstract

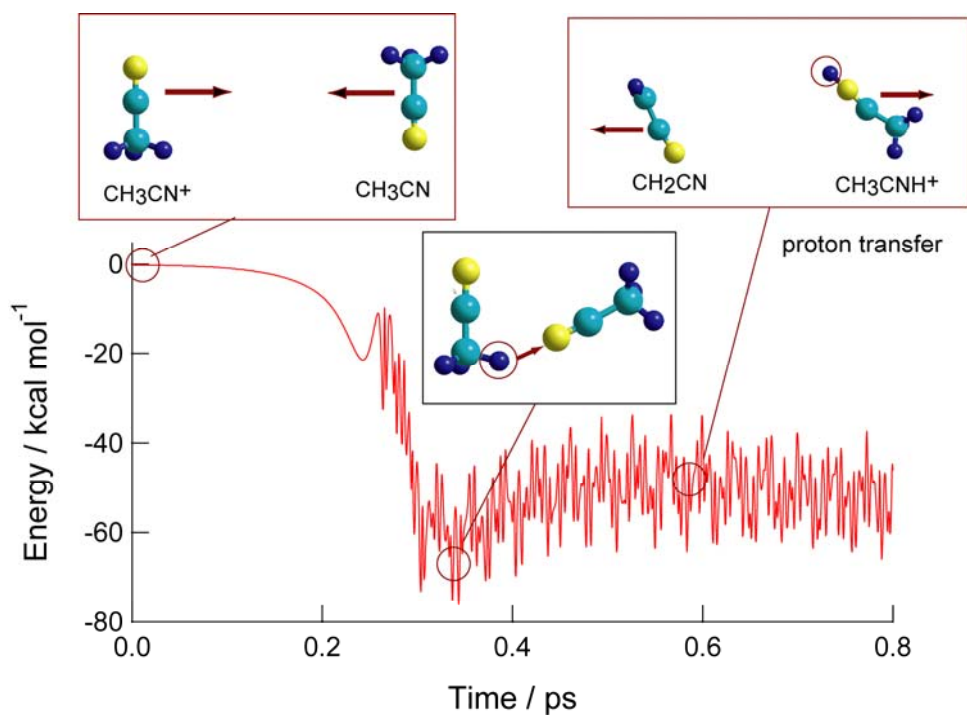

## 2. Optimized structures of neutral and radical cation of CH<sub>3</sub>CN

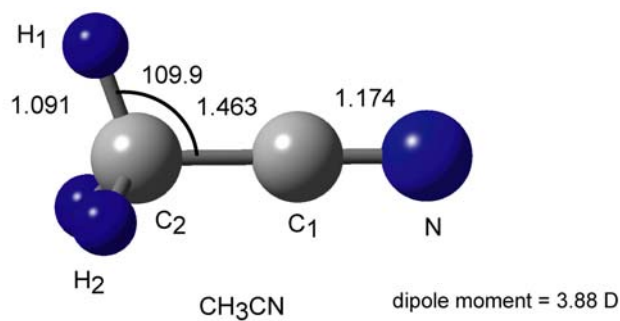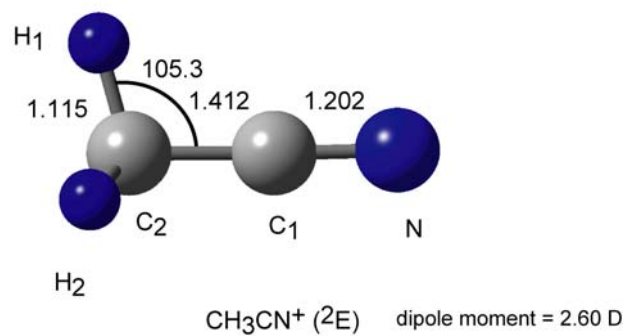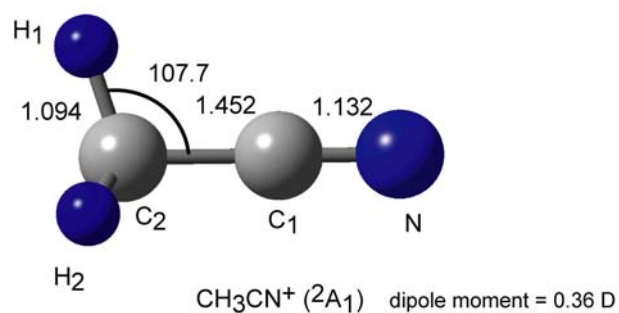

*Figure S1.* Optimized structures of (upper) neutral acetonitrile CH<sub>3</sub>CN, (middle) CH<sub>3</sub>CN<sup>+</sup>(<sup>2</sup>E) and (lower) CH<sub>3</sub>CN (<sup>2</sup>A<sub>1</sub>) calculated at the MP2/6-311++G(d,p) level.

### 3. Spin densities

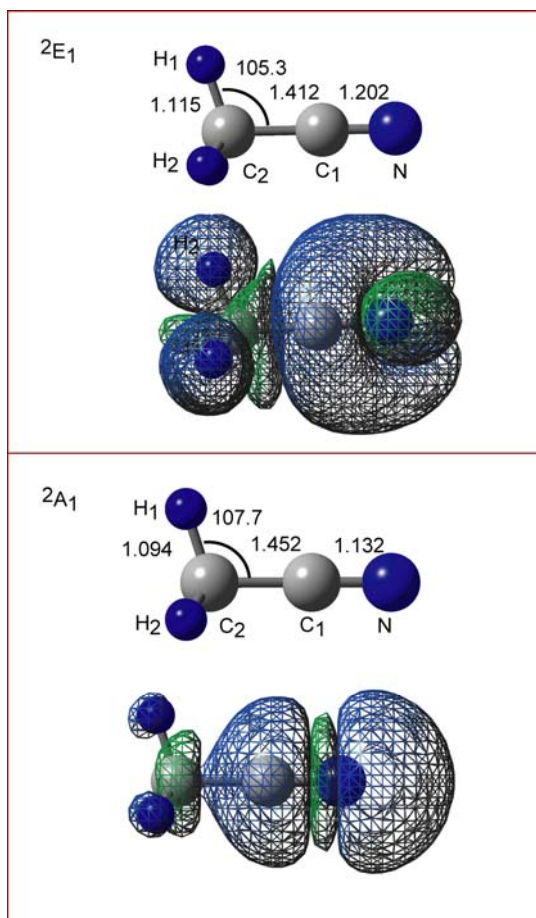

*Figure S2.* Special distributions of spin densities of  $\text{CH}_3\text{CN}^+$  ( ${}^2E$ ) and  $\text{CH}_3\text{CN}$  ( ${}^2A_1$ ) calculated at the MP2/6-311++G(d,p) level.
